# Supplementary material for: A comprehensive ethnic-based analysis of alpha thalassaemia allelle frequency in northern Thailand
Source: PubMed Central journal article supplement (PMC5498591; doi:10.1038/s41598-017-04957-2), 2017-07-05
Supplement: 41598_2017_4957_MOESM1_ESM.pdf [file 41598_2017_4957_MOESM1_ESM.pdf]

## Supplementary Information

### **A comprehensive ethnic-based analysis of alpha thalassaemia allele frequency in northern Thailand**

Mattapong Kulaphisit,<sup>1</sup> Jatupol Kampuansai,<sup>1</sup> Kamonlak Leecharoenkiat,<sup>2</sup> Methi  
Wathikthinnakon,<sup>1</sup> Daoroong Kangwanpong,<sup>1</sup> Thongperm Munkongdee,<sup>4</sup> Saovaros Svasti,<sup>4</sup>  
Suthat Fucharoen,<sup>4</sup> Duncan R. Smith<sup>3</sup> and Pathrapol Lithanatudom<sup>1\*</sup>

<sup>1</sup> Department of Biology, Faculty of Science, Chiang Mai University, Chiang Mai, 50300,  
Thailand.

<sup>2</sup> Department of Clinical Microscopy, Faculty of Allied Health Sciences, Chulalongkorn  
University, Bangkok, 10330, Thailand.

<sup>3</sup> Molecular Pathology Laboratory, Institute of Molecular Biosciences, Mahidol University,  
Nakornpathom, 73170, Thailand

<sup>4</sup> Thalassemia Research Center, Institute of Molecular Biosciences, Mahidol University,  
Nakornpathom, 73170, Thailand.

\*Correspondence and requests for materials should be addressed to P.L. (email:  
pathrapol\_li@hotmail.com)

## Supplementary figures

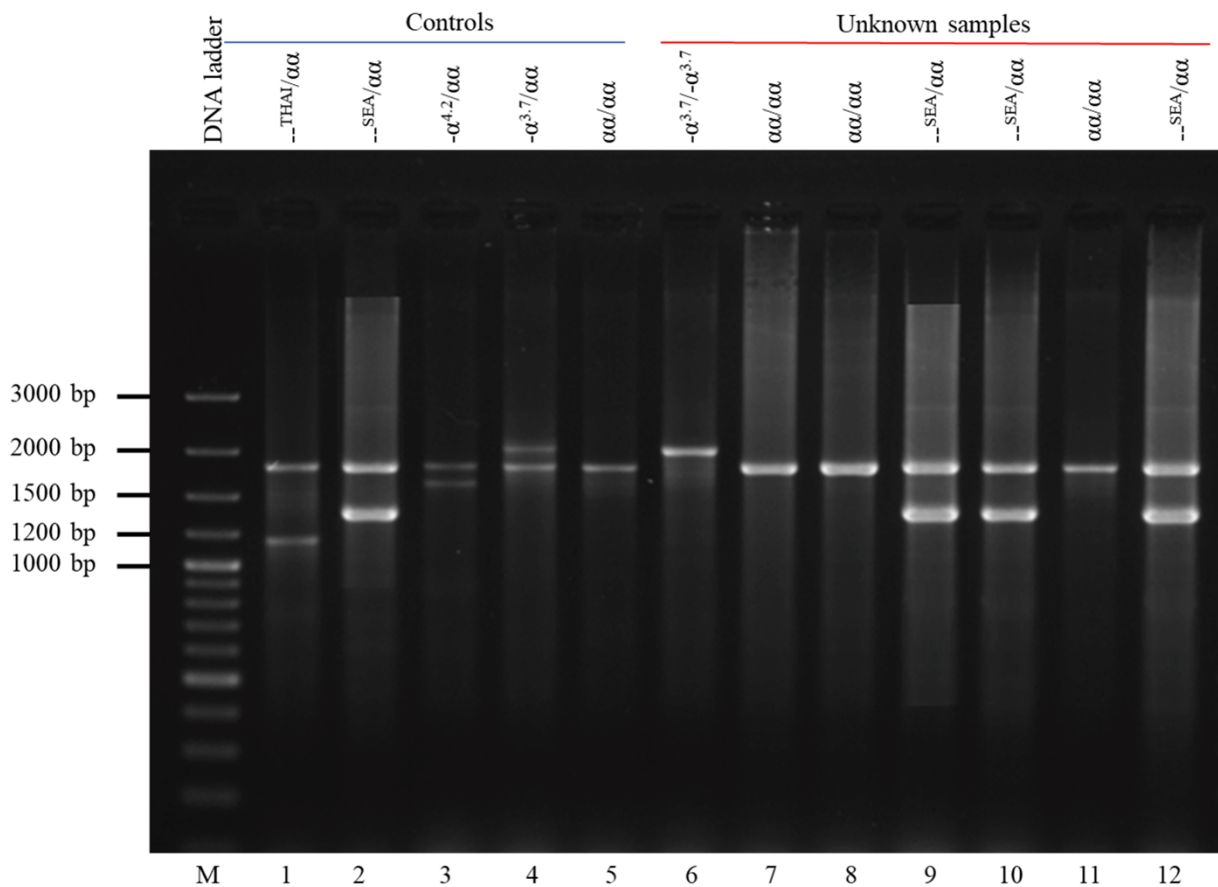

**Supplementary Figure S1. PCR product of deletional  $\alpha$ -thalassaemia analysed using the multiplex-gap PCR.** M = DNA marker, lane 1-4 = positive control of alpha-globin heterozygotes which are  $--^{THAI}/\alpha\alpha$ ,  $--^{SEA}/\alpha\alpha$ ,  $-\alpha^{4.2}/\alpha\alpha$  and  $-\alpha^{3.7}/\alpha\alpha$  respectively, lane 5 = negative control, lane 6 = unknown sample genotyped as  $-\alpha^{3.7}$  homozygote, lane 7-8 and 11 = unknown samples genotyped as normal, lane 9-10 and 12 = unknown samples genotyped as  $--^{SEA}$  heterozygotes. No overexposure and high-contrast are applied to the gel. The cropped gel is employed in the main figure (Figure 1a).

### Sample list

|        |        |        |        |        |        |        |        |        |        |                  |
|--------|--------|--------|--------|--------|--------|--------|--------|--------|--------|------------------|
| TL-146 | TL-150 | TL-151 | TL-157 | TL-159 | TL-160 | TL-162 | TL-164 | TL-167 | TL-169 | Positive control |
|        |        |        |        |        |        |        |        |        |        | Normal           |
| TL-180 | TL-201 | TL-202 | TL-208 | TL-210 | TL-211 | TL-212 | TL-216 | TL-218 | TL-220 | Positive control |
|        |        |        |        |        |        |        |        |        |        | HbCS             |
| TL-221 | TL-222 | TL-223 | TL-228 | TL-230 | TL-231 | TL-234 | TL-235 | TL-238 | TL-239 | Positive control |
|        |        |        |        |        |        |        |        |        |        | HbPS             |

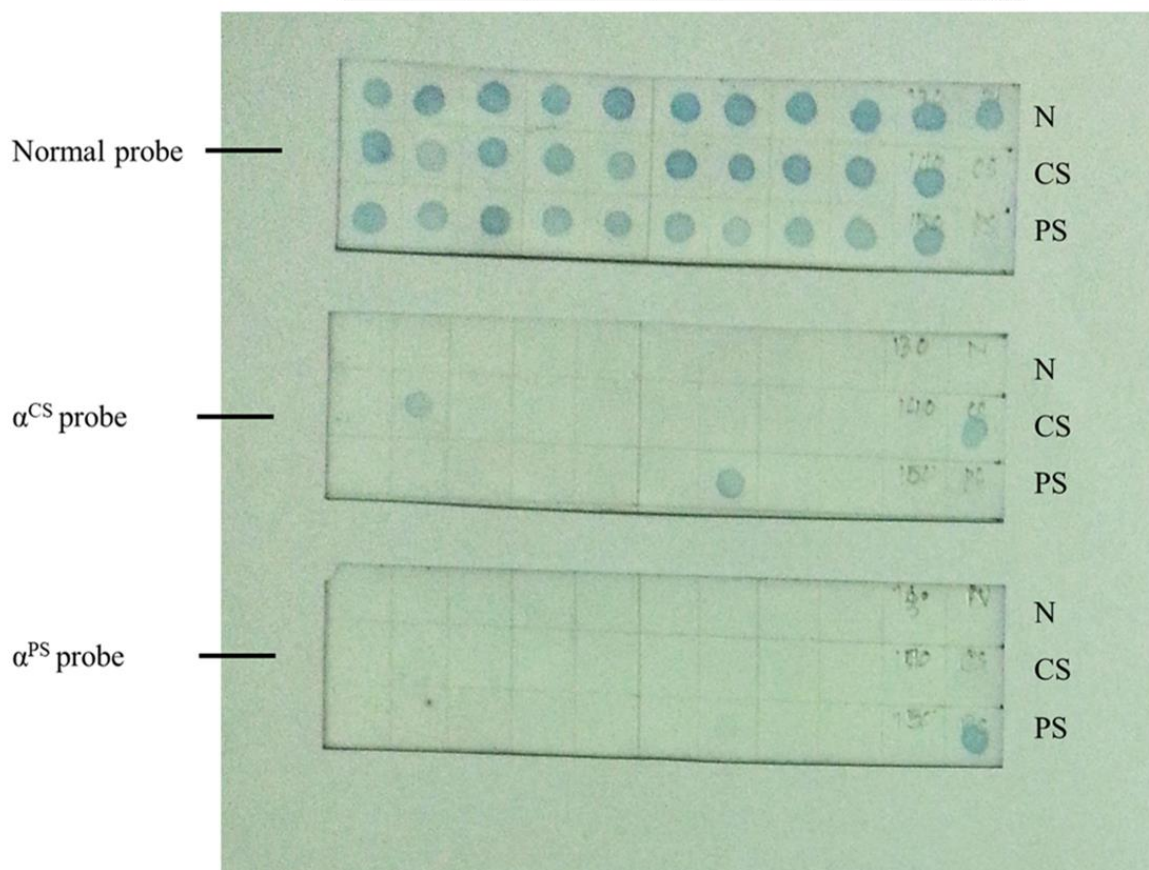

**Supplementary Figure S2. Dot-blot hybridization analysis of samples from The Lue ethnic group.** Samples TL-201 and TL-234 were genotyped as  $\alpha^{CS}$  heterozygotes. No samples were positive for  $\alpha^{PS}$ . No overexposure and high-contrast are applied to the blot. The cropped blot is employed in the main figure (Figure 1b).
